# Supplementary material
Source: MDPI journal article supplement (https://www.mdpi.com/2673-9984/2/1/7)

**ECU**  
**2021**

# The 1st Electronic Conference on Universe

22–28 FEBRUARY 2021 | ONLINE

**Boris G. ALIYEV**

Altendorfer Str. 28, 09113, Chemnitz, Germany

e-mail: [bgaliyev@mail.ru](mailto:bgaliyev@mail.ru)

**Dark Matter, Dark Energy and Something Else in 5D Theory**

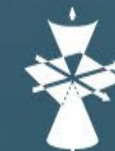

*universe*

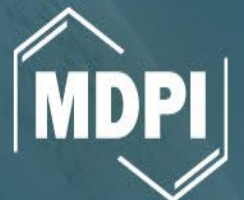

## Outline

- Introduction.
- Monad and dyad methods.
- 5D Geodetic Equations.
- (4+1) and (3+1+1) reductions of the 5D Geodetic Equations
- Integral of the  $x^5$  projected 5D Geodetic Equations and  
new concept of the rest mass
- $V_4$  and  $V_3$  projected 5D Geodetic Equations.
- 4D Lorentz and Brance-Dicke Forces
- New rest mass concept and related matters
- 5D Ricci identities and their physical consequences
- Conclusions

$\frac{e}{m} \neq const \Rightarrow$  No 5D Optics!

5D interval:  $dI^2 = ds^2 - d\lambda^2$ ;  $ds^2 = g_{AB} dx^A dx^B$ ;  $d\lambda = \lambda_A dx^A$

5D signature: (+-----)

5D metric:  $G_{AB} = g_{AB} - \lambda_A \lambda_B = \tau_A \tau_B - \lambda_A \lambda_B - h_{AB}$ ;  $\lambda_A \lambda^A = -1$ ;  $\tau_A \tau^A = 1$ .

5D Geodetic equations:  $G^A \equiv \frac{d^2 x^A}{dI^2} + P_{BC}^A \frac{dx^B}{dI} \frac{dx^C}{dI} = 0$ .

### Killing Equations

$$\lambda^A \cdot \lambda^B \cdot L_{\xi} G_{AB} = \lambda^A \lambda^B (\xi_{A;B} + \xi_{B;A}) = -2\bar{\partial}_{\Lambda}^+ \phi = 0 \Rightarrow \bar{\partial}_{\Lambda}^+ \phi = 0;$$

$$\lambda^A g_{\alpha}^B (\xi_{A;B} + \xi_{B;A}) = \phi^2 \bar{\partial}_{\Lambda}^+ (\lambda_{\alpha} / \phi) = \frac{2}{c^2} \sqrt{k_0} \phi^2 \bar{\partial}_{\Lambda}^+ A_{\alpha} = 0 \Rightarrow \bar{\partial}_{\Lambda}^+ A_{\alpha} = 0;$$

$$g_{\alpha}^A g_{\beta}^B (\xi_{A;B} + \xi_{B;A}) = \phi \bar{\partial}_{\Lambda}^{+} g_{\alpha\beta} = 0 \Rightarrow \bar{\partial}_{\Lambda}^{+} g_{\alpha\beta} = 0.$$

(4+1) reduction of the 5D Geodetic Equations

$$m_0 \lambda_A G^A = \frac{D^+}{ds} (\phi \hat{p}) = 0 \Rightarrow \phi \hat{p} = \text{const} = \frac{ne}{2\sqrt{k_0}} = n \hat{m}_{Pl};$$

$$m_0 g_A^{\alpha} G^A = 0 \Rightarrow \frac{D^+ \bar{p}^{\alpha}}{ds} = \frac{2\sqrt{k_0}}{c^2} \phi \hat{p} \bar{u}^{\beta} F_{\beta.}^{\alpha} + \bar{\partial}^{+\alpha} \hat{m}_0;$$

$$m_0 g_A^{\alpha} G^A = 0 \Rightarrow \frac{D^+ \bar{p}^{\alpha}}{ds} = \frac{Q_0}{c^2} \bar{u}^{\beta} F_{\beta.}^{\alpha} + \bar{\partial}^{+\alpha} \hat{m}_0.$$

## (3+1+1) reduction of the 5D Geodetic Equations

$$m_0 \tau_A G^A = 0 \Rightarrow \frac{D^+ \hat{m}}{d\tau} = \hat{p}^i (\bar{F}_i - \bar{v}^k \bar{D}_{ik}) - \frac{Q_0}{c^2} \bar{v}^i \bar{E}_i + \frac{Q_0 \sqrt{1 - \bar{v}^2}}{2\sqrt{k_0} \phi} \bar{\partial}_\tau^+ \hat{m}_0$$

$$-m_0 h_A^i G^A = 0 \Rightarrow \frac{D^+ \hat{p}^i}{d\tau} = \frac{Q_0}{c^2} (\bar{E}^i - \bar{v}^k H_{.k}^i) - \hat{m} \bar{F}^i + 2 \hat{p}^k \bar{D}_k^i + \frac{Q_0 \sqrt{1 - \bar{v}^2}}{2\sqrt{k_0} \phi} \bar{\partial}^{+i} \hat{m}_0.$$

$$\hat{m}_0 = m_0 / \sqrt{1 - \hat{u}^2}; \quad \hat{u} = \frac{d\lambda}{ds}; \quad \bar{v}^k = \frac{d\bar{x}^k}{d\tau}; \quad \hat{m}_0 = \sqrt{m_0^2 + \frac{Q_0^2}{4k_0\phi^2}} = \sqrt{m_0^2 + \frac{n^2 \hat{m}_{Pl}^2}{\phi^2}}.$$

$$\text{Mass angle: } \chi_n = \text{Arcsinh} \frac{n \hat{m}_{Pl}}{m_0 \phi}; \quad \hat{m}_0 = m_0 \cosh \chi_n.$$

$$\hat{m}_0 = \sqrt{m_{0z} \bar{m}_{0z}}; \quad m_{0z} = m_0 + i n \hat{m}_{Pl} / \phi; \quad m_{0z} = \hat{m}_0 e^{i\psi_n}$$

$$\psi_n = \arctan \{ n \hat{m}_{Pl} / (m_0 \phi) \}; \quad \bar{m}_{0z} = m_0 - i n \hat{m}_{Pl} / \phi.$$

$$f_{BD}^\alpha = -\frac{Q_0^2 P^{\alpha\beta} \Phi_\beta}{4k_0 \hat{m}_0 \phi^2} < 0 \quad (?). \quad \text{Here } P^{\alpha\beta} = g^{\alpha\beta} - \bar{u}^\alpha \bar{u}^\beta; \quad \Phi_\beta = \bar{\nabla}_\beta^+ \ln \phi.$$

$$V_3 \rightarrow V_4 \rightarrow V_5 \rightarrow \dots \rightarrow V_n \Rightarrow m_0 \rightarrow m = m_0 / \sqrt{1 - (v/c)^2} \rightarrow \hat{m}_0 \rightarrow \dots \rightarrow \hat{m}_{0n}.$$

New (generalized) rest mass concept

$$\hat{m}_0 = \sqrt{m_0^2 + \frac{Q_0^2}{4k_0 \phi^2}} = \frac{m_0}{\sqrt{1 - \hat{u}^2}} = \sqrt{m_0^2 + \frac{n^2 \hat{m}_{Pl}^2}{\phi^2}}.$$

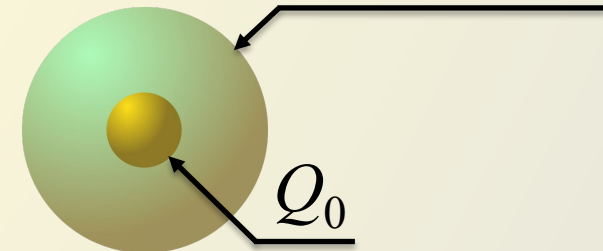

No scalar charge!

## Brake radiation force (Bremsstrahlung force)

$$g_E^\alpha = \frac{2e^3 \bar{u}^\gamma}{3\hat{m}_0 c^3} \left( \bar{u}^\beta \bar{\nabla}_\gamma^+ F_{\beta\cdot}^\alpha + \frac{e \cdot P^{\alpha\delta}}{\hat{m}_0 c^2} F_{\beta\delta} F_{\gamma\cdot}^\beta \right): \text{ Electric}$$

$$g_S^\alpha = -\frac{e^4 P^{\alpha\beta} \bar{u}^\gamma}{6ck_0 \phi^2 \hat{m}_0^2} \left( \bar{\nabla}_\gamma^+ \Phi_\beta - 2\Phi_\beta \Phi_\gamma + \frac{3e^2 \Phi_\beta \Phi_\gamma}{4k_0 \phi^2 \hat{m}_0^2} \right): \text{ Scalar}$$

$$g_{ES}^\alpha = -\frac{e^5}{6c^3 k_0 \phi^2 \hat{m}_0^3} \left( g^{\beta\delta} P^{\alpha\gamma} - 3g^{\alpha\gamma} \bar{u}^\beta \bar{u}^\delta \right) F_{\beta\gamma} \Phi_\delta: \text{ Mixed}$$

$$R_{(BCD)}^A = R_{\cdot BCD}^A + R_{\cdot DBC}^A + R_{\cdot CDB}^A = 0: \text{ 5D Ricci identities}$$

$$g_A^\alpha g_\beta^B g_\gamma^C g_\delta^D R_{(BCD)}^A = R_{(\beta\gamma\delta)}^\alpha = R_{\cdot\beta\gamma\delta}^\alpha + R_{\cdot\delta\beta\gamma}^\alpha + R_{\cdot\gamma\delta\beta}^\alpha = 0: \text{ 4D Ricci identities}$$

$$\lambda_A g_\alpha^B g_\beta^C g_\gamma^D R_{(BCD)}^A = 0 \Rightarrow F_{(\alpha\beta;\gamma)} + 2F_{(\alpha\beta} \Phi_{\gamma)} = 0;$$

$$\lambda_A \lambda^D g_\alpha^B g_\beta^C R_{(BCD)}^A = 0 \Rightarrow \frac{2\sqrt{k_0}}{c^2} F_{\alpha\beta} \bar{\partial}_\Lambda^+ \phi = \Phi_{\alpha;\beta} - \Phi_{\beta;\alpha}.$$

$$\Phi_{\beta;\alpha} - \Phi_{\alpha;\beta} = m_{\alpha\beta} : \text{curl} \neq 0; \quad \Phi_{\alpha;\beta} = \Phi_{\beta;\alpha} : \text{curl} = 0.$$

$m_{\alpha\beta} \rightarrow$  north (n-monopole);  $m_{\beta\alpha} \rightarrow$  south (s-monopole)

or vice versa

1<sup>st</sup> pair of Maxwell's equations

$$F_{(\alpha\beta;\gamma)} \equiv F_{\alpha\beta;\gamma} + F_{\gamma\alpha;\beta} + F_{\beta\gamma;\alpha} = \frac{c^2}{\sqrt{k_0} \bar{\partial}_\Lambda^+ \phi} (\Phi_\alpha m_{\beta\gamma} - \Phi_\beta m_{\alpha\gamma} + \Phi_\gamma m_{\alpha\beta}) : \text{r.h.s.} \neq 0$$

$$F_{\alpha\beta;\gamma} + F_{\gamma\alpha;\beta} + F_{\beta\gamma;\alpha} = 0 : \text{r.h.s.} = 0.$$



$$\bar{\nabla}_\nu^+(\phi^3 F^{\mu\nu}) = -\frac{8\pi}{c^2} \sqrt{k_0} \phi Q_5^\mu : \text{ 2nd pair of Maxwell's equations}$$

$$Q^{AB} = \mu_0 c \frac{dx^A}{dI} \frac{dx^B}{d\tau} : \text{ 5D energy-momentum tensor of 5D dust.}$$

Here  $\mu_0$  is matter density.

$$\nabla_\nu^+ F^{\mu\nu} = \frac{3c^2 \Phi_\nu m^{\mu\nu}}{2\sqrt{k_0} \bar{\partial}_\Lambda^+ \phi} = -\frac{4 \cdot \pi}{c} \bar{j}_m^\mu; \quad \nabla_\nu^+ F^{\mu\nu} = -\frac{4\pi}{c\phi^2} \bar{j}_e^\mu; \quad \bar{j}_e^\mu = \rho_0 \bar{v}^\mu = \rho_0 \frac{d\bar{x}^\mu}{d\tau};$$

$$\rho_0 \text{ is electric charge density. } \bar{\nabla}_\nu^+ F^{\mu\nu} = -\frac{4 \cdot \pi}{c} \left[ \theta(t_0 - t) \bar{j}_m^\mu + \theta(t - t_0) \phi^{-2} \bar{j}_e^\mu \right];$$

$$\theta(t - t_0) = \begin{cases} 0 & \text{at } t < t_0 \\ 1 & \text{at } t \geq t_0 \end{cases} \quad \text{Here } t_0 \text{ is cylindrical phase.}$$

## Conclusions

- ❑ If one goes beyond the 5D optics, certain new and very non-trivial properties of the matter and 4D Universe may come into being. Specifically, a new concept of the rest mass may be obtained.
- ❑ The implementation of the monad method to the  $(4+1)$  splitting of the 5D Ricci identities makes it possible to understand how the Riemannian structure of the World affects its physical properties.
- ❑ It permits one to approach closer to the understanding of the magnetic monopole problem and the origins of the Maxwell equations.
- ❑ The obtained results also provide new insight into the mechanism of the expansion of the 4D Universe and its acceleration.

**Thank you very much for your attention!**  
ΓΡΑΦΕΙΟ ΤΩΝ ΕΡΕΥΝΩΝ

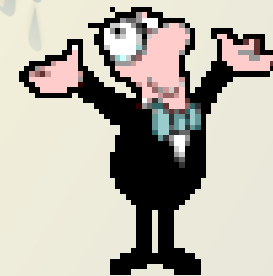

Supplement: s1 [file s1]
